# Supplementary material for: Establishment of a rapid and sensitive method based on recombinase polymerase amplification to detect mts90, a new molecular target of Mycobacterium tuberculosis
Source: Royal Society of Chemistry journal article supplement (doi:10.1039/c7ra09999a), 2017-01-01
Supplement: c7ra09999a1.pdf [file c7ra09999a1.pdf]

## Supplementary Materials

### Establishment of a rapid and sensitive method based on Recombinase Polymerase Amplification to detect mts90, a new molecular target of *Mycobacterium tuberculosis*

Yunjun Mo, Fang Cui, Dairong Li, Yi Dai, Xinmin Li, Xinyuan Zhang, Yulan Qiu, Yibing Yin, Xuemei

Zhang and Wenchun Xu

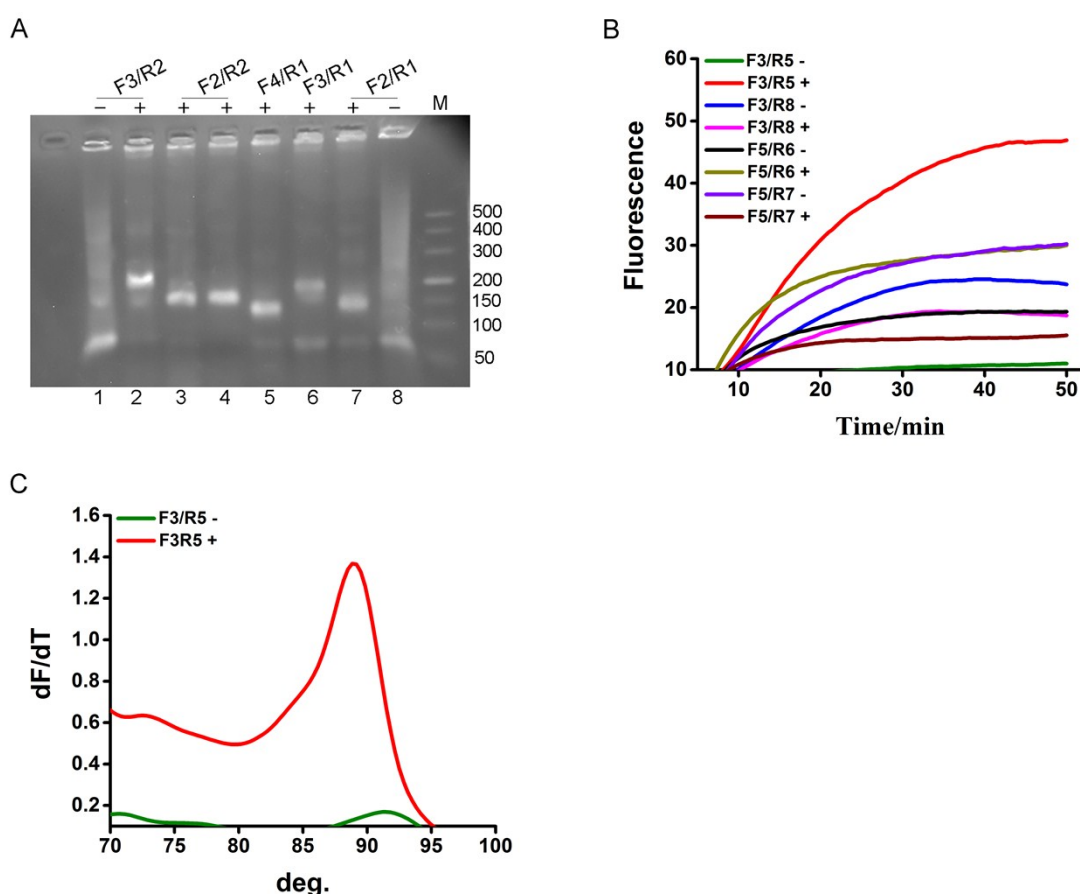

**Figure S1. Screening for primers by electrophoresis and fluorescent dye.** (A) Different primer pairs were analyzed by electrophoresis analysis. Lane 1, 2: F3/R2; lane 3, 4: F2/R2; lane 5: F4/R1; lane 6: F3/R1; lane 7, 8: F2/R2; lane M = 500 bp DNA ladder. The primer pair of F3/R2 was selected. (B) Amplification effect of different primers was monitored in real time by EvaGreen® Dye. There was a significant difference in fluorescence intensity between positive and negative amplification of F3/R5. (C) The melting curve of F3/R5. It proved the specific amplification. The RPA reactions analyzed by Gel were performed in 39°C water bath, while RPA reactions with EvaGreen® Dye were played in the Rotor-Gene Q. The template of screening primers was 0.1µg mts90 standard plasmid per reaction.

(□ positive reaction; □ no template control).

A

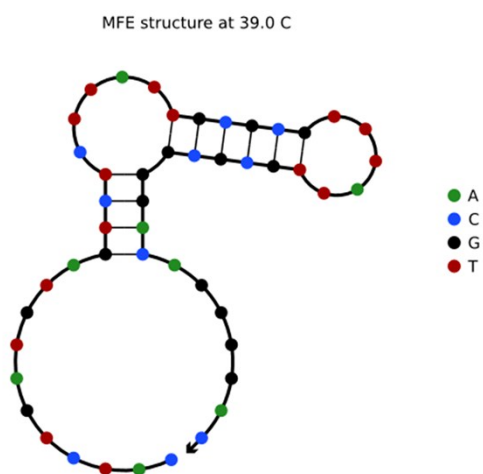

Free energy of secondary structure: -5.18 kcal/mol

B

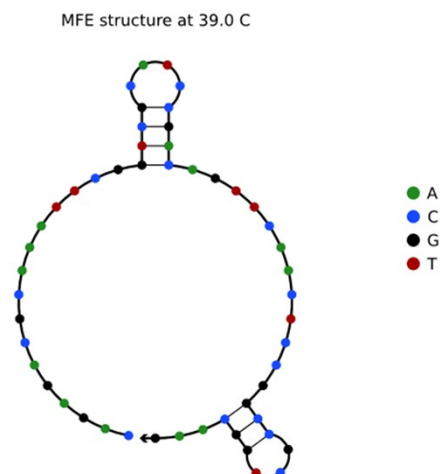

Free energy of secondary structure: -4.95 kcal/mol

**Figure S2. The secondary structures of probes.** (A) The probe of P1. (B) The probe of P2. Schematic illustration of the secondary structures for the designed probes was showed online (<http://www.nupack.org/>), each probe was analyzed at a concentration of 0.12 nM in 39 °C.
